# Supplementary material for: Knowledge of acute stroke management and the predictors among Malaysian healthcare professionals
Source: PeerJ journal article supplement (doi:10.7717/peerj.13310), 2022-04-20
Supplement: Supplement_Figure_S1.pdf [file Supplement_Figure_S1.pdf]

**Figure S1: Area under the ROC curve - shows the model's ability to discriminate between good and poor knowledge for overall knowledge on stroke.**

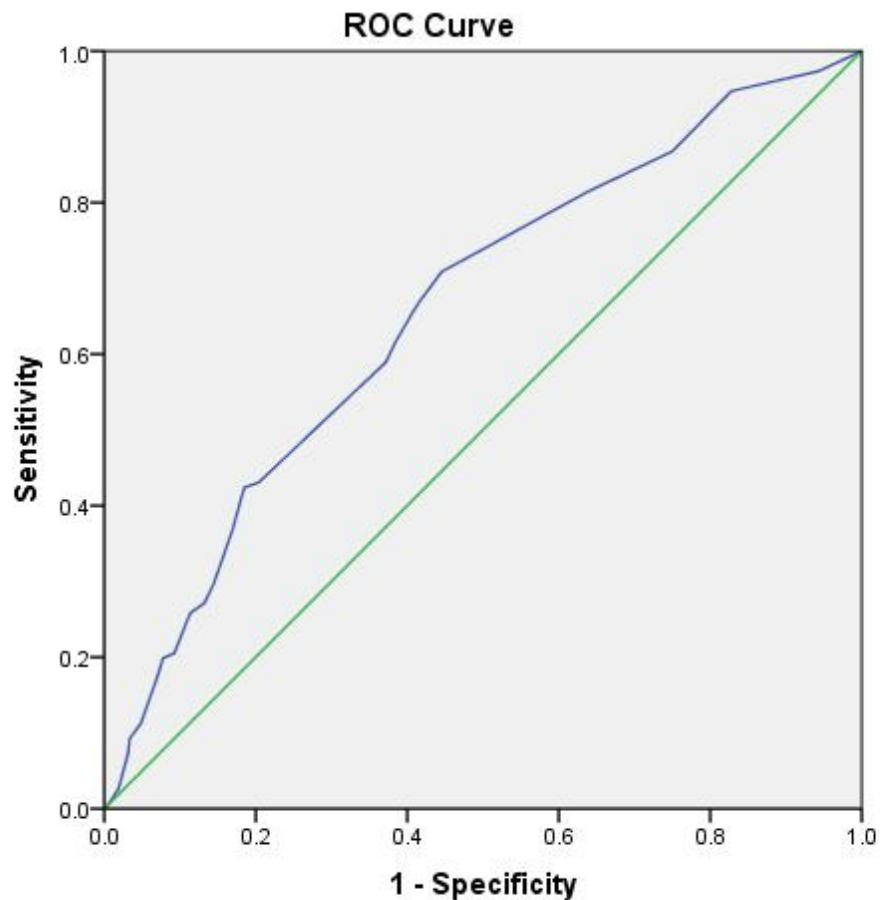

Diagonal segments are produced by ties.

#### Area Under the Curve

Test Result Variable(s): Predicted probability

| Area | Std. Error <sup>a</sup> | Asymptotic Sig. <sup>b</sup> | Asymptotic 95% Confidence Interval |             |
|------|-------------------------|------------------------------|------------------------------------|-------------|
|      |                         |                              | Lower Bound                        | Upper Bound |
| .658 | .025                    | .000                         | .608                               | .708        |

The test result variable(s): Predicted probability has at least one tie between the positive actual state group and the negative actual state group. Statistics may be biased.

a. Under the nonparametric assumption

b. Null hypothesis: true area = 0.5
